# Supplementary material for: Dynamic microtubule association of Doublecortin X (DCX) is regulated by its C-terminus
Source: PubMed Central journal article supplement (PMC5507856; doi:10.1038/s41598-017-05340-x), 2017-07-12
Supplement: 41598_2017_5340_MOESM2_ESM.pdf [file 41598_2017_5340_MOESM2_ESM.pdf]

## Movie S1

### GFP- $\alpha$ -tubulin

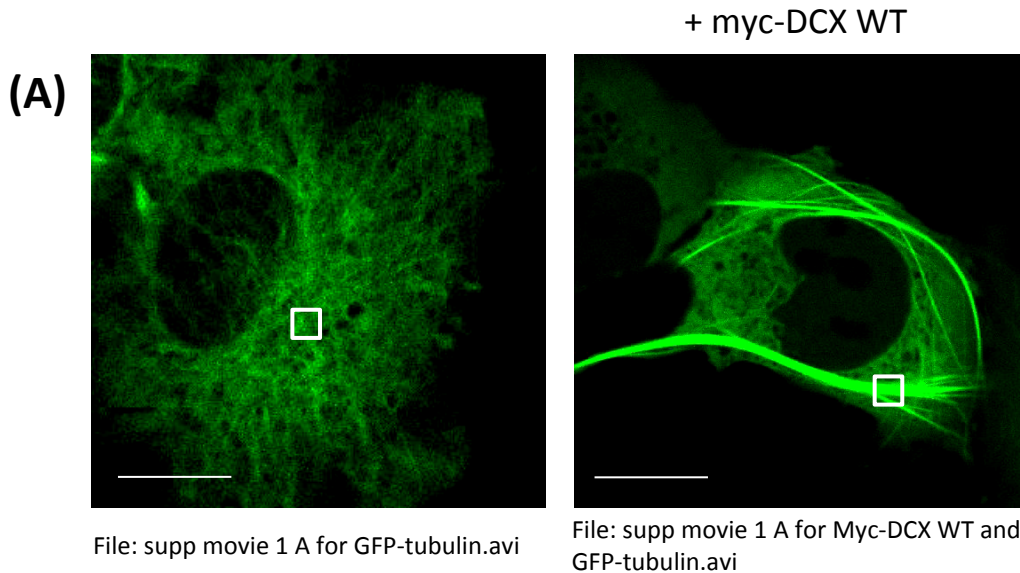

### GFP-DCX WT

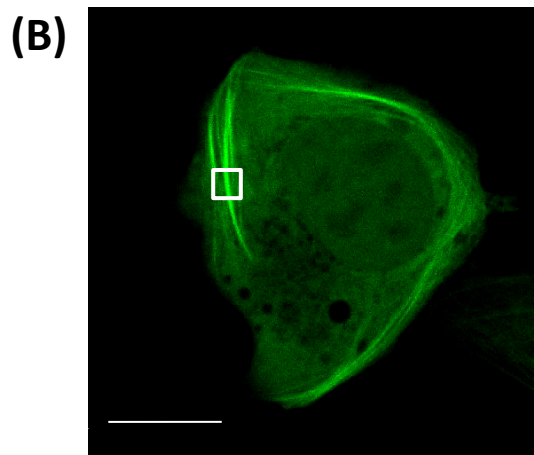

File: supp movie 1 B for GFP-DCX WT.avi

**Movie S1: FRAP assessments of GFP- $\alpha$ -tubulin or GFP-DCX associations with the microtubule network.** COS-1 cells were transfected to express (A) GFP- $\alpha$ -tubulin only or GFP- $\alpha$ -tubulin and myc-DCX WT to induce microtubule bundling and (B) GFP-DCX WT. S1A showed the fluorescence recovery of GFP- $\alpha$ -tubulin in the absence (left) and presence (right) of myc-DCX WT. S1B showed the fluorescence recovery of full-length GFP-DCX WT. In these movies, we monitored the fluorescence recovery of the mentioned constructs for 60 s (1 frame/s). Scale bars represent 10  $\mu$ m. See Figure 1 for quantitative analyses.

## Movie S2

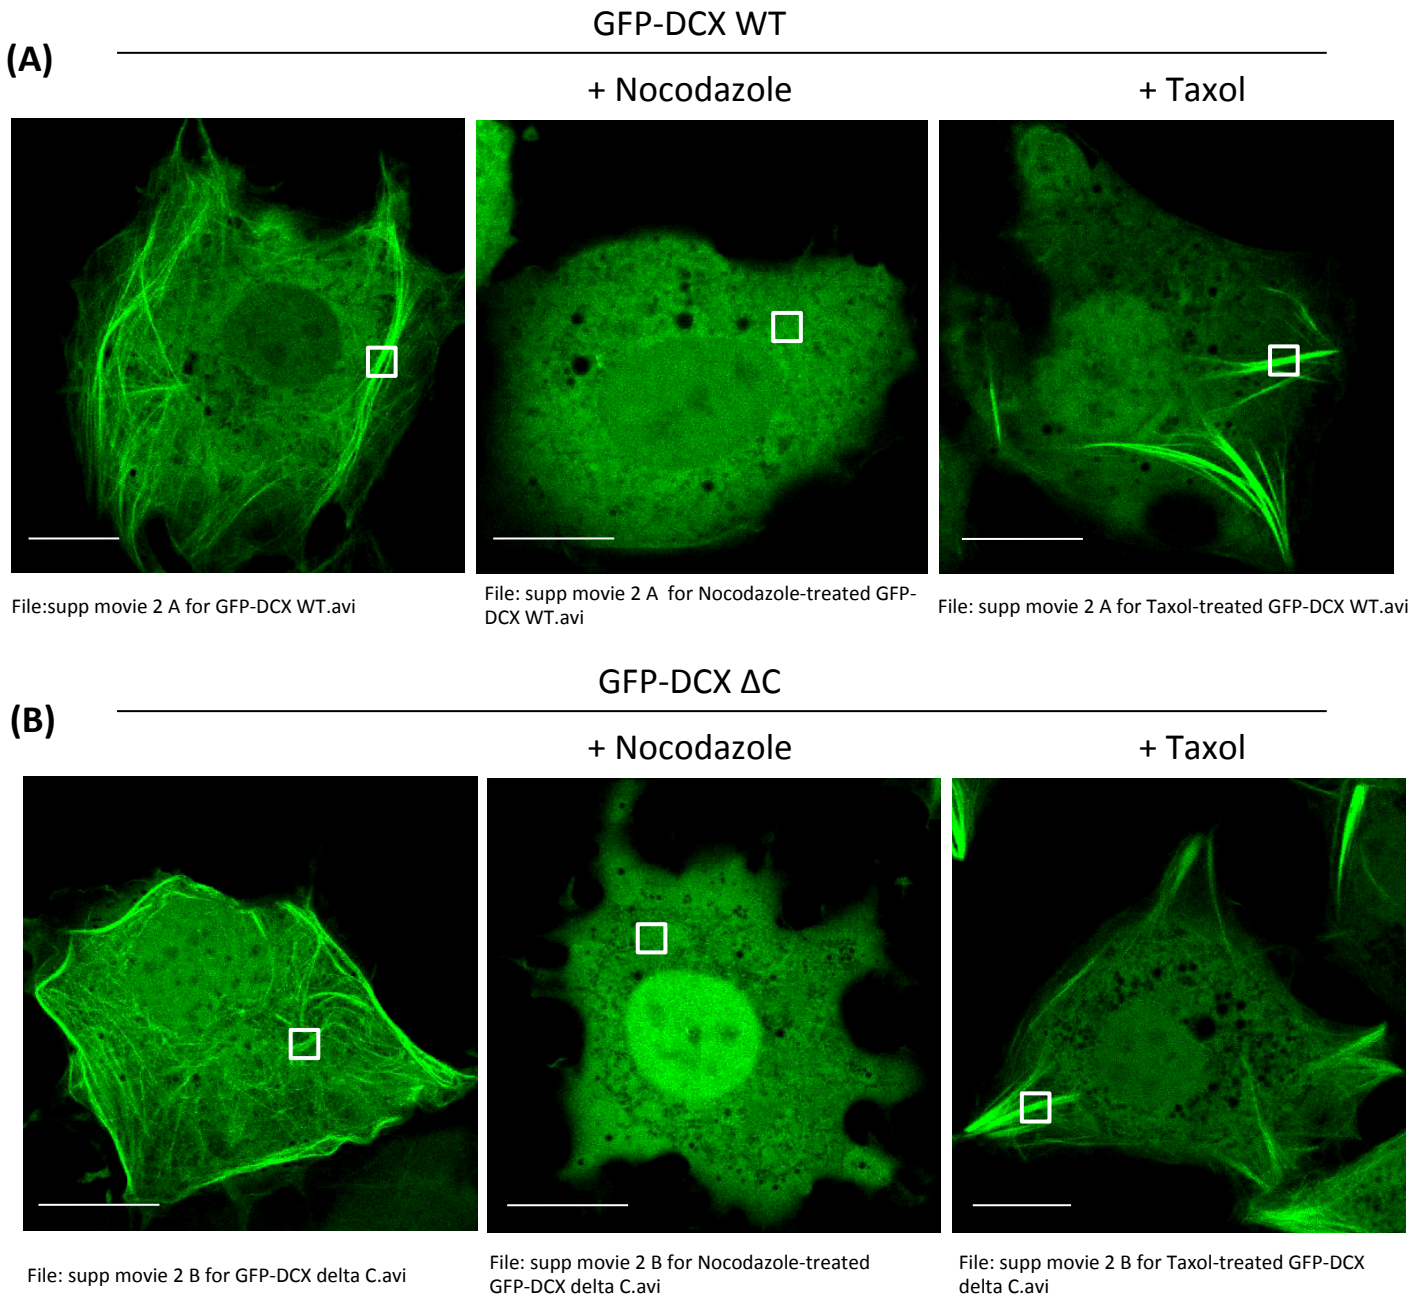

**Movie S2: Deletion of the DCX C-terminus slows DCX dynamics of association with microtubule bundles and decrease DCX's sensitivity to microtubule conformational changes.** COS-1 cells were transfected to express (A) GFP-DCX WT and (B) GFP-DCX  $\Delta$ C. (A) Fluorescence recovery was monitored for non-treated GFP-DCX WT (left), nocodazole-treated GFP-DCX WT (middle) and taxol-treated GFP-DCX WT (right) for 60 s. (B) Fluorescence recovery was monitored for non-treated GFP-DCX  $\Delta$ C (left), nocodazole-treated GFP-DCX  $\Delta$ C (middle) and taxol-treated GFP-DCX  $\Delta$ C (right) for 60 s (1 frame/s). Scale bars represent 10  $\mu$ m. See Figures 3 and 4 for quantitative analyses.

## Movie S3

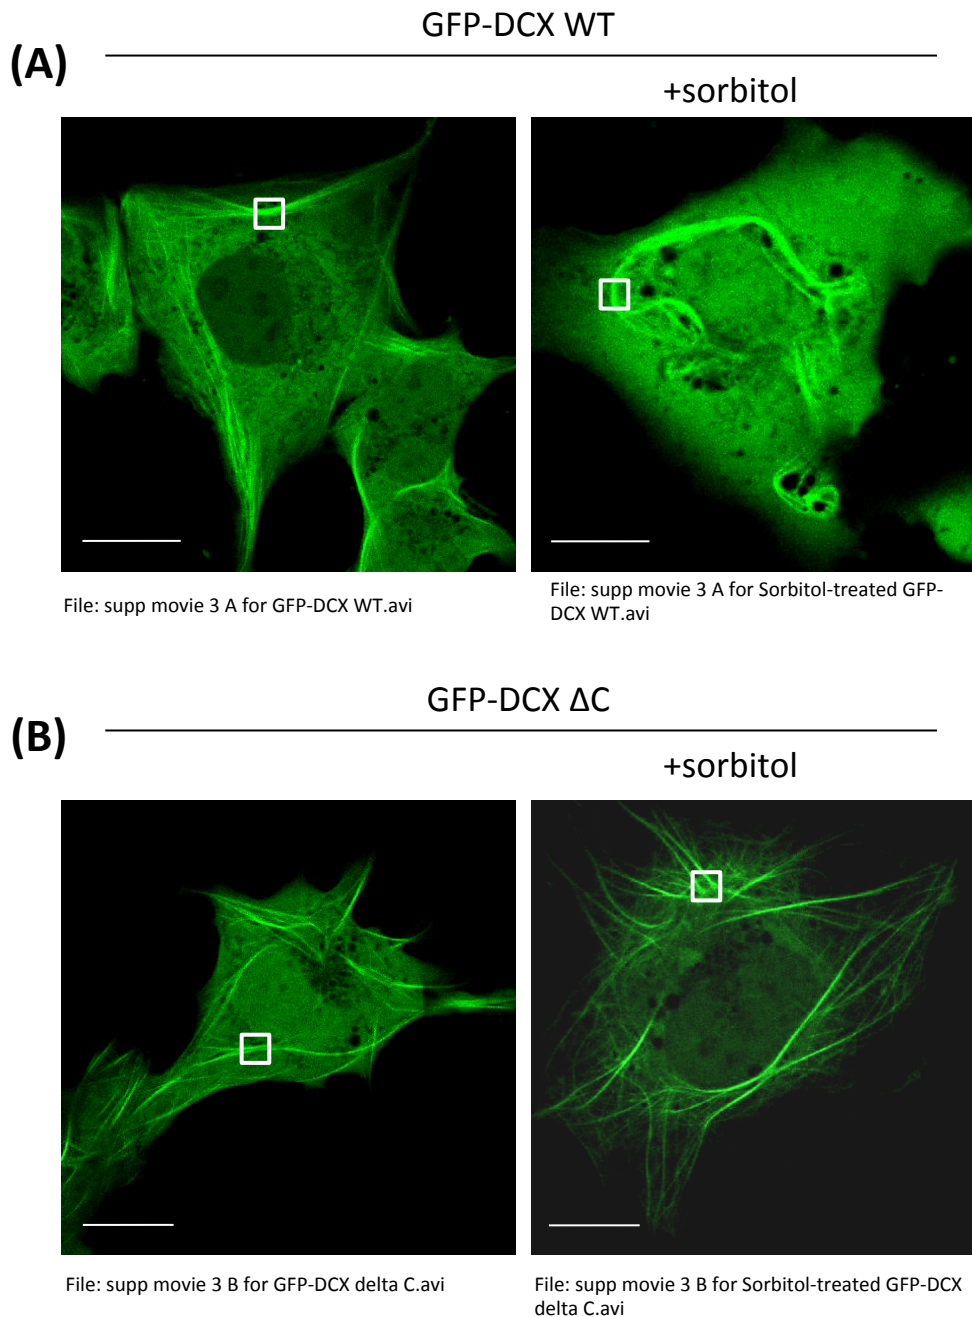

**Movie S3: Osmotic stress decreases DCX dynamic association with microtubules while DCX  $\Delta$ C shows no difference in kinetics under basal and osmotic stress conditions.** COS-1 cells were transfected to express (A) GFP-DCX WT and (B) GFP-DCX  $\Delta$ C. Cells were treated with sorbitol (0.5M for 1 h) to induce hyperosmotic stress. (A) Fluorescence recovery was monitored for non-treated GFP-DCX WT (left) and sorbitol-treated GFP-DCX WT (right) for 60 s. (B) Fluorescence recovery was monitored for non-treated GFP-DCX  $\Delta$ C (left) and sorbitol-treated GFP-DCX  $\Delta$ C (right) for 60 s (1 frame/s). Scale bars represent 10  $\mu$ m. See Figures 5 and 6 for quantitative analyses

## Movie S4

### (A) GFP- $\alpha$ -tubulin

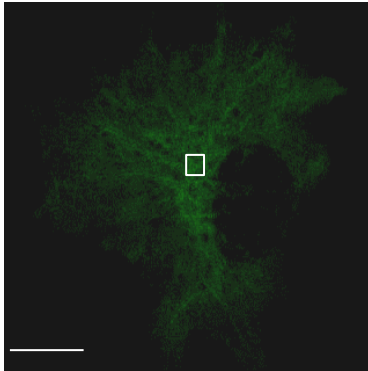

File: supp movie 4 A for GFP-tubulin.avi

### (B)

GFP- $\alpha$ -tubulin + sorbitol

+ myc-DCX WT

+ myc-DCX  $\Delta$ C

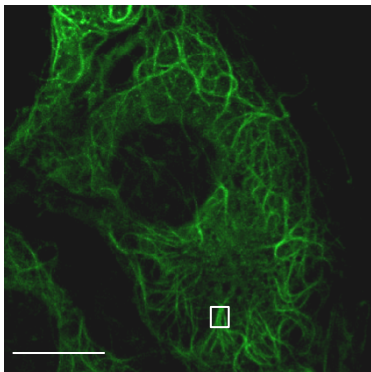

File: supp movie 4 B for Sorbitol-treated GFP-tubulin.avi

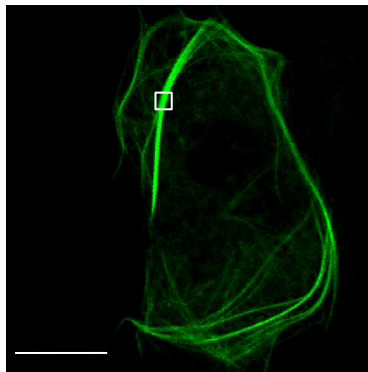

File: supp movie 4B for Sorbitol-treated Myc-DCX WT and GFP-tubulin.avi

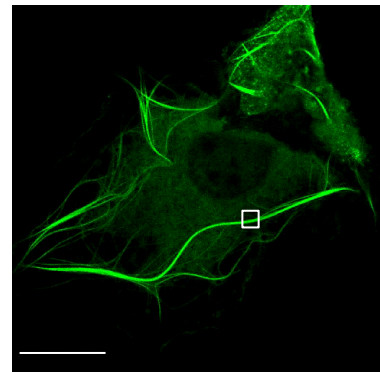

File: supp movie 4B for Sorbitol-treated Myc-DCX deltaC and GFP-tubulin.avi

**Movie S4: Osmotic stress conditions affect tubulin exchange dynamics.** COS-1 cells were transfected to express GFP- $\alpha$ -tubulin, together with myc-DCX WT or myc-DCX  $\Delta$ C as indicated. (B) Cells were treated with sorbitol (0.5M for 1 h) as indicated to induce hyperosmotic stress. Fluorescence recovery was monitored for 60 s (1 frame/s). Scale bars represent 10  $\mu$ m. See Figures 7 and 8 for quantitative analyses
